# Supplementary material for: Photocatalytic Dye and Cr(VI) Degradation Using a Metal-Free Polymeric g-C3N4 Synthesized from Solvent-Treated Urea
Source: MDPI journal article supplement (doi:10.3390/polym11010182), 2019-01-21
Supplement: s1 [file s1]

# **Photocatalytic dye and Cr(VI) degradation using a metal-free polymeric g-C<sub>3</sub>N<sub>4</sub> synthesized from solvent-treated urea**

Chechia Hu<sup>a\*</sup>, Yi-Ching Chu<sup>a</sup>, Yan-Ru Lin<sup>a</sup>, Hung-Chun Yang<sup>a</sup>, Ke-Hsuan Wang<sup>b</sup>

<sup>a</sup> Department of Chemical Engineering and R&D Center for Membrane Technology, Chung Yuan

Christian University, Chungli Dist., Taoyuan City, Taiwan 32023

<sup>b</sup> Department of Industrial Chemistry, Tokyo University of Science, Shinjuku-ku, Tokyo, Japan

\* To whom correspondence should be addressed. E-mail: [chechiah@cyu.edu.tw](mailto:chechiah@cyu.edu.tw)

Tel: +886-3-2654152 Fax: +886-3-2654199

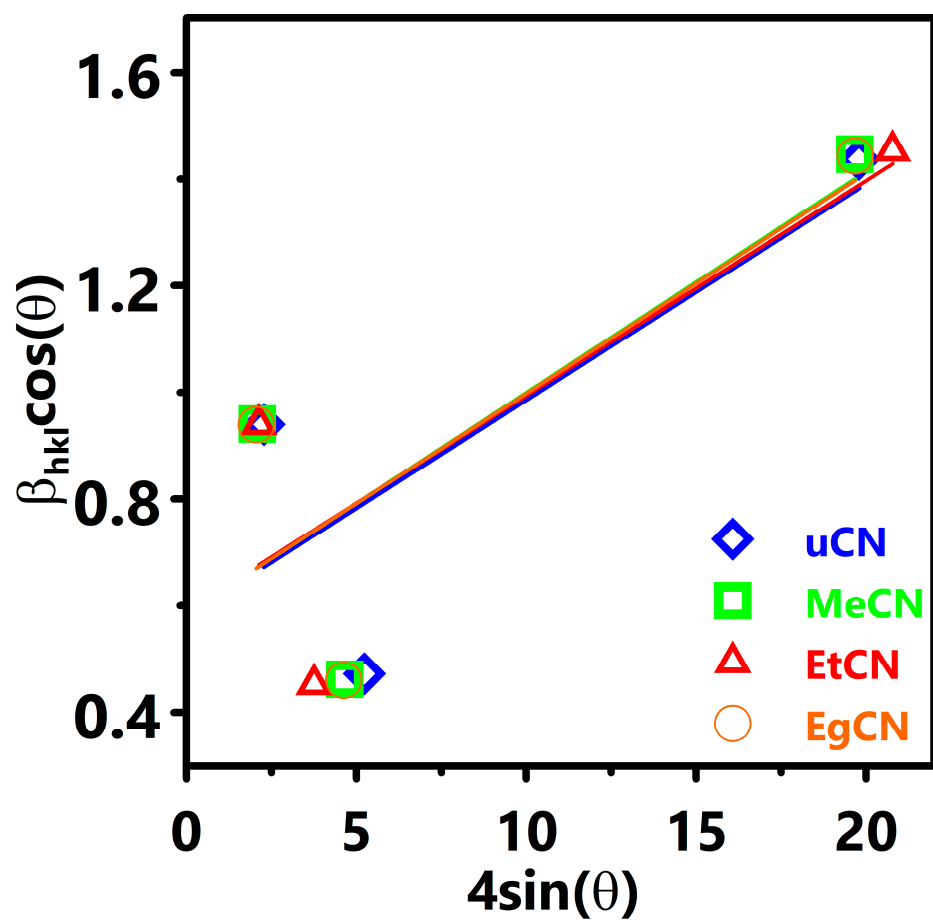

**Figure S1** Williamson-Hall plot for uCN, MeCN, EtCN, and EgCN samples.

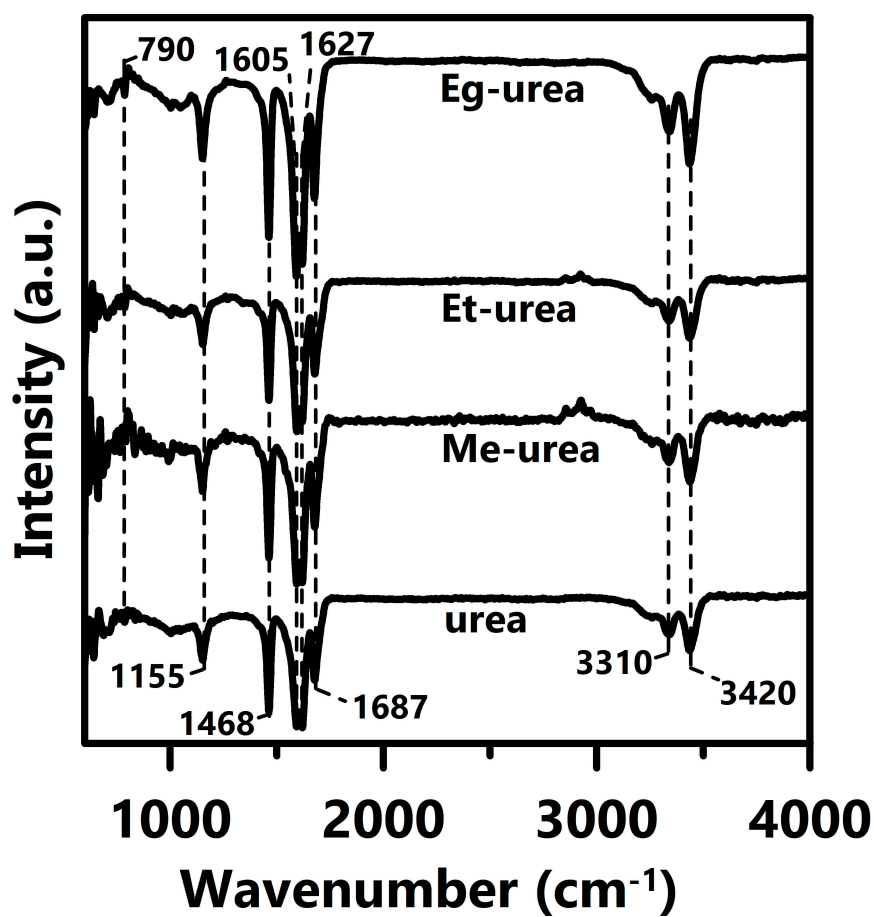

**Figure S2** FTIR spectra of urea treated with various solvents including methanol (Me-urea), ethanol (Et-urea), and ethylene glycol (Eg-urea).

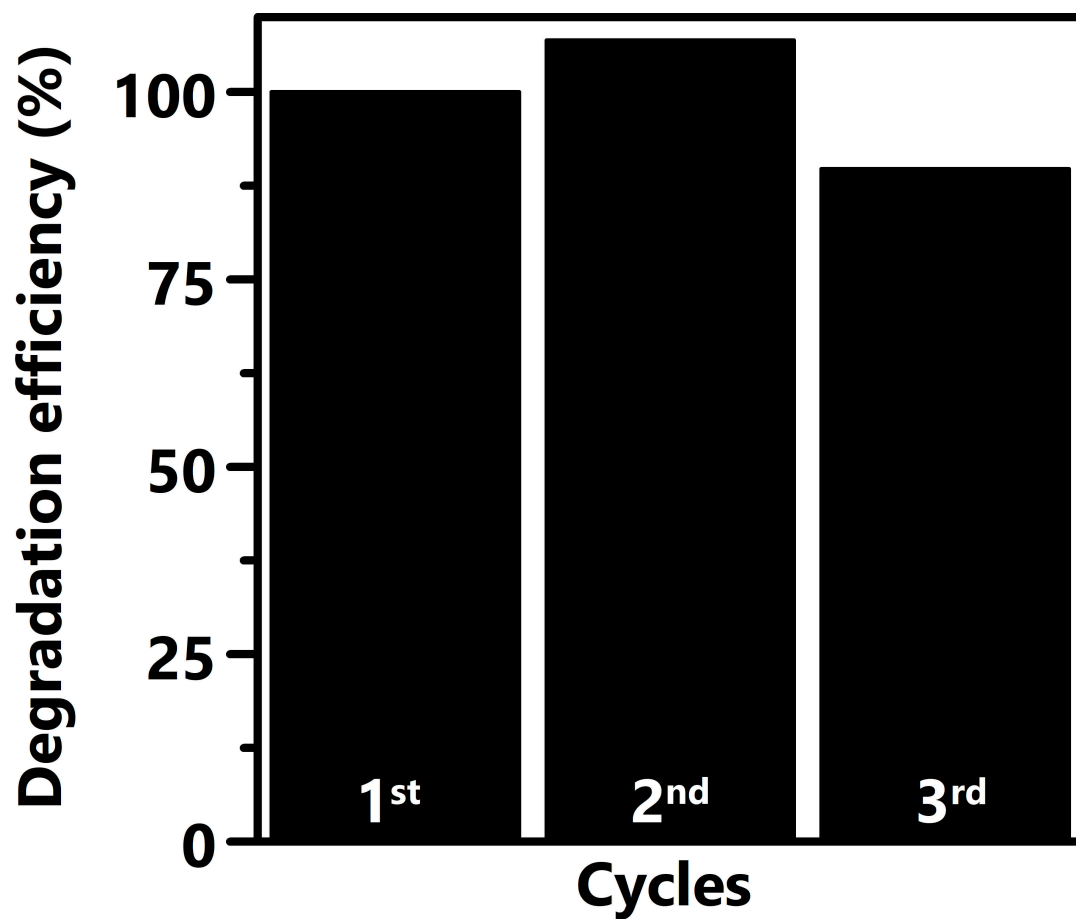

**Figure S3** Reusability of the EtCN photocatalyst for the photocatalytic MO degradation during three cycles. The degradation efficiency is calculated based on the rate constant ( $k$ ).
